# Supplementary material for: The Matrikine Acetylated Proline-Glycine-Proline Couples Vascular Inflammation and Acute Cardiac Rejection
Source: PubMed Central journal article supplement (PMC5548740; doi:10.1038/s41598-017-07610-0), 2017-08-08
Supplement: 41598_2017_7610_MOESM1_ESM.pdf [file 41598_2017_7610_MOESM1_ESM.pdf]

## Supplementary Information:

### The Matrikine Acetylated Proline-Glycine-Proline Couples Vascular Inflammation and Acute Cardiac Rejection

Gregory A. Payne MD, PhD<sup>1,3,4\*</sup>, Jindong Li<sup>2,4</sup>, Xin Xu MD, PhD<sup>2,4</sup>, Patricia Jackson PhD<sup>2,4-6</sup>, Hongwei Qin PhD<sup>7</sup>, David M. Pollock PhD<sup>9</sup>, J. Michael Wells MD<sup>2,4-6</sup>, Suzanne Oparil MD<sup>1,3,7</sup>, Massoud Leesar MD<sup>1,6</sup>, Rakesh P. Patel PhD<sup>4,8</sup>, J. Edwin Blalock PhD<sup>2,4,5,7†</sup> and Amit Gaggar MD, PhD<sup>2-7\*†</sup>

<sup>1</sup>*Division of Cardiovascular Disease, Department of Medicine, University of Alabama at Birmingham, Birmingham, AL*

<sup>2</sup>*Division of Pulmonary, Allergy & Critical Care Medicine, Department of Medicine, University of Alabama at Birmingham, Birmingham, AL*

<sup>3</sup>*Vascular Biology and Hypertension Program, University of Alabama at Birmingham, Birmingham, AL*

<sup>4</sup>*Program in Protease and Matrix Biology, University of Alabama at Birmingham, Birmingham, AL*

<sup>5</sup>*Lung Health Center, University of Alabama at Birmingham, Birmingham, AL*

<sup>6</sup>*Medical Service at Birmingham VA Medical Center, Birmingham, AL*

<sup>7</sup>*Department of Cell, Developmental, and Integrative Biology, University of Alabama at Birmingham, Birmingham, AL*

<sup>8</sup>*Department of Pathology and Center for Free Radical Biology, University of Alabama at Birmingham, Birmingham, AL*

<sup>9</sup>*Cardio-Renal Physiology and Medicine, Division of Nephrology, Department of Medicine, University of Alabama at Birmingham, Birmingham, AL*

*\*denotes corresponding authors*

*†denotes equal contribution*

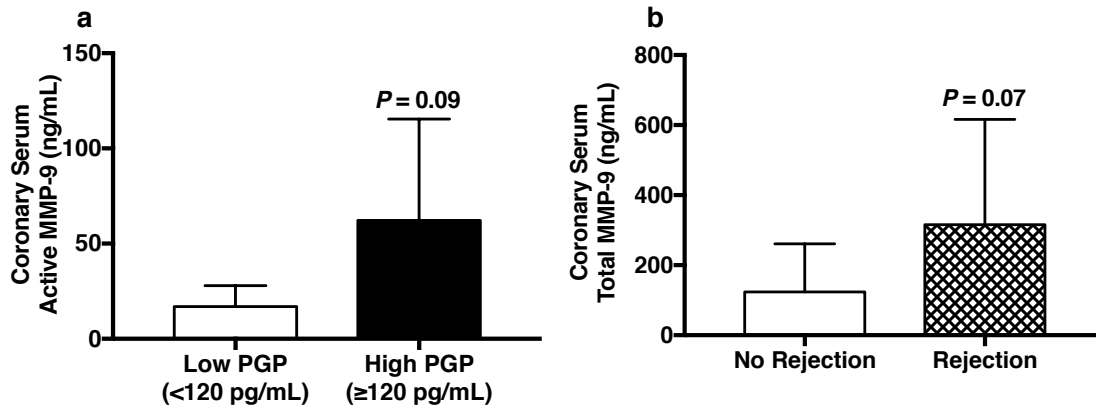

**Supplementary Figure 1. MMP-9 expression associates with PGP generation and acute cardiac rejection.** (a) In heart transplant patients, coronary serum PGP levels were elevated and associated with a trend toward increased active MMP-9 within coronary serum ( $P = 0.09$  compared to Low PGP,  $n = 11$  patients). (b) Similarly, patients with biopsy proven acute transplant rejection trended toward increased coronary serum total MMP-9 ( $P = 0.07$  compared to No Rejection,  $n = 11$  patients).
